# Supplementary material
Source: publisher figshare collection journal article supplement (https://gsajournals.figshare.com/articles/dataset/_/7075025)
Supplement: Supplementary file 1 [file 2]

## REFERENCES FOR SUPPLEMENTAL TABLES AND FIGURES

- Chen, P., S. K. Sapperstein, J. D. Choi and S. Michaelis, 1997 Biogenesis of the *Saccharomyces cerevisiae* mating pheromone **a**-factor. *J Cell Biol* 136: 251-269.
- Giaever, G., A. M. Chu, L. Ni, C. Connelly, L. Riles *et al.*, 2002 Functional profiling of the *Saccharomyces cerevisiae* genome. *Nature* 418: 387-391.
- Hildebrandt, E. R., M. Cheng, P. Zhao, J. H. Kim, L. Wells *et al.*, 2016 A shunt pathway limits the CaaX processing of Hsp40 Ydj1p and regulates Ydj1p-dependent phenotypes. *Elife* 5.
- Krishnankutty, R. K., S. S. Kukday, A. J. Castleberry, S. R. Breevoort and W. K. Schmidt, 2009 Proteolytic processing of certain CaaX motifs can occur in the absence of the Rce1p and Ste24p CaaX proteases. *Yeast* 26: 451-463.
- London, N., C. L. Lamphear, J. L. Hougland, C. A. Fierke and O. Schueler-Furman, 2011 Identification of a novel class of farnesylation targets by structure-based modeling of binding specificity. *PLoS Comput Biol* 7: e1002170.
- Michaelis, S., and I. Herskowitz, 1988 The **a**-factor pheromone of *Saccharomyces cerevisiae* is essential for mating. *Mol. Cell. Biol.* 8: 1309-1318.
- Shoemaker, D. D., D. A. Lashkari, D. Morris, M. Mittmann and R. W. Davis, 1996 Quantitative phenotypic analysis of yeast deletion mutants using a highly parallel molecular bar-coding strategy. *Nat Genet* 14: 450-456.
- Sikorski, R. S., and P. Hieter, 1989 A system of shuttle vectors and yeast host strains designed for efficient manipulation of DNA in *Saccharomyces cerevisiae*. *Genetics* 122: 19-27.
- Stein, V., M. H. Kubala, J. Steen, S. M. Grimmond and K. Alexandrov, 2015 Towards the systematic mapping and engineering of the protein prenylation machinery in *Saccharomyces cerevisiae*. *PLoS One* 10: e0120716.
